# Supplementary material for: TBC1D8 Amplification Drives Tumorigenesis through Metabolism Reprogramming in Ovarian Cancer
Source: PubMed Central journal article supplement — Theranostics. 2019 Jan 24;9(3):676–90. doi: 10.7150/thno.30224 (PMC6376479; doi:10.7150/thno.30224), 2019-01-24
Supplement: thnov09p0676s2.pdf [file thnov09p0676s2.pdf]

## Supplementary Data

### Supplementary Figures

**Figure S1**

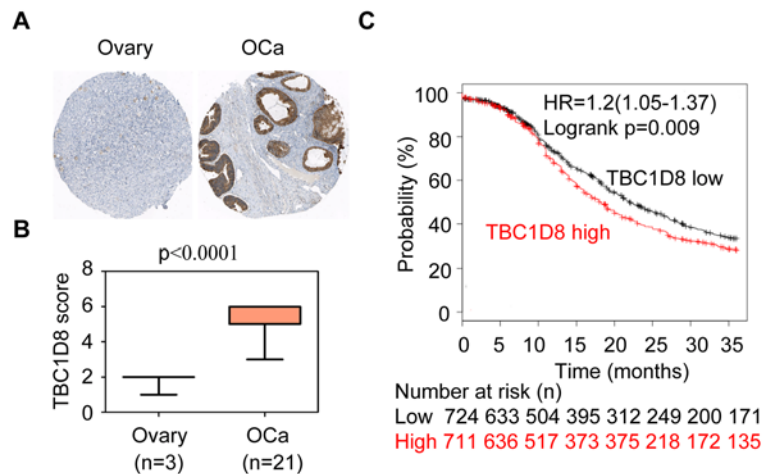

**Figure S1.** TBC1D8 is up-regulated in OVCA and the OVCA patients with high TBC1D8 level have shorter survival time. (A) Representative immunohistochemical (IHC) images of TBC1D8 in OVCA and normal ovarian tissues deposited in the Human Protein Atlas database. (B) The differences in TBC1D8 expression scores between OVCA and normal ovarian tissues are presented as a box plot from data deposited in The Human Protein Atlas database. (C) The Kaplan-Meier survival probability of OVCA patients according to TBC1D8 level from data deposited in The Human Protein Atlas database.

**Figure S2**

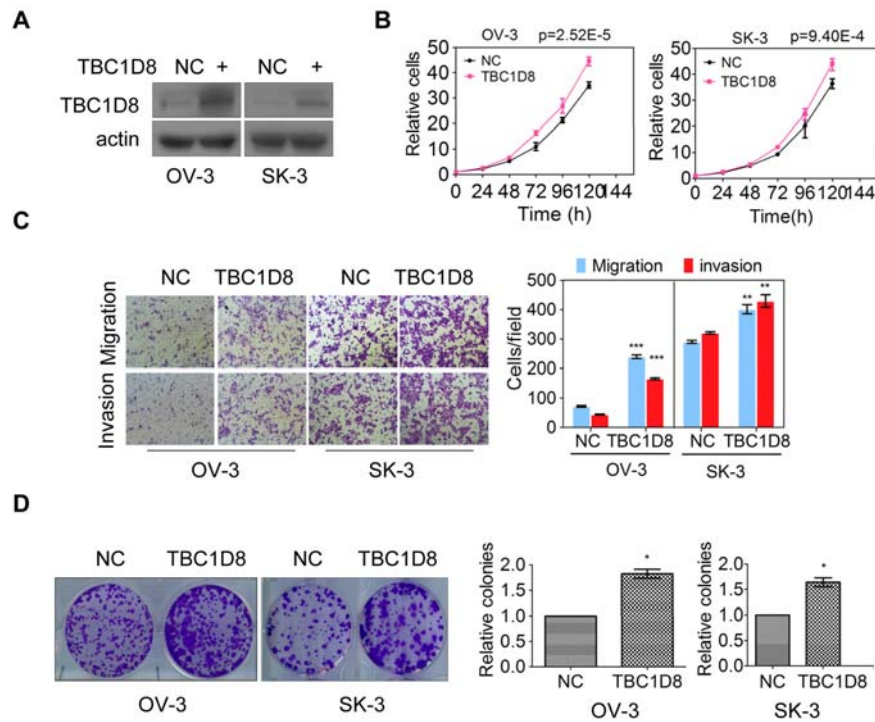

**Figure S2.** *TBC1D8* overexpression promotes a more malignant OVCA cell phenotype. (A, B) OV-3 and SK-3 cells were transfected with *TBC1D8* plasmid; the *TBC1D8* protein level was detected by Western blotting (A); and the cell number was measured (B) (n=3). (C) OV-3 and SK-3 cells were transfected with *TBC1D8* plasmids, and the migration and invasion abilities were determined using transwell assays (left panel). The migrated and invasive cells were counted (right panel) (n=3). (D) OV-3 and SK-3 cells were transfected with *TBC1D8* plasmids, and the colony-forming abilities were measured after two weeks (left panel). The colony number was counted (right panel) (n=3).

**Figure S3**

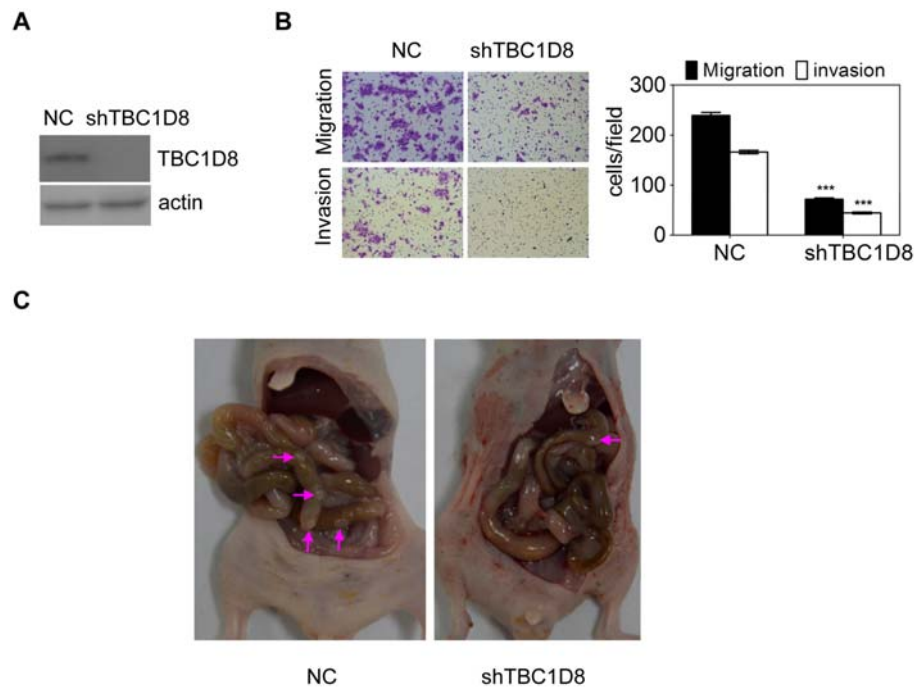

**Figure S3.** OV-3<sup>high</sup> cells with *TBC1D8* expression stably silenced exhibited reduced migration and invasion abilities. (A) *TBC1D8* expression was silenced in OV-3<sup>high</sup> cells with *TBC1D8* expression stably silenced. (B) The migration and invasion abilities were determined in OV-3<sup>high</sup> cells with *TBC1D8* expression stably silenced. (C) The metastases to the mesentery, omentum, diaphragm and perihepatic sites in Figure 3F were observed.

**Figure S4**

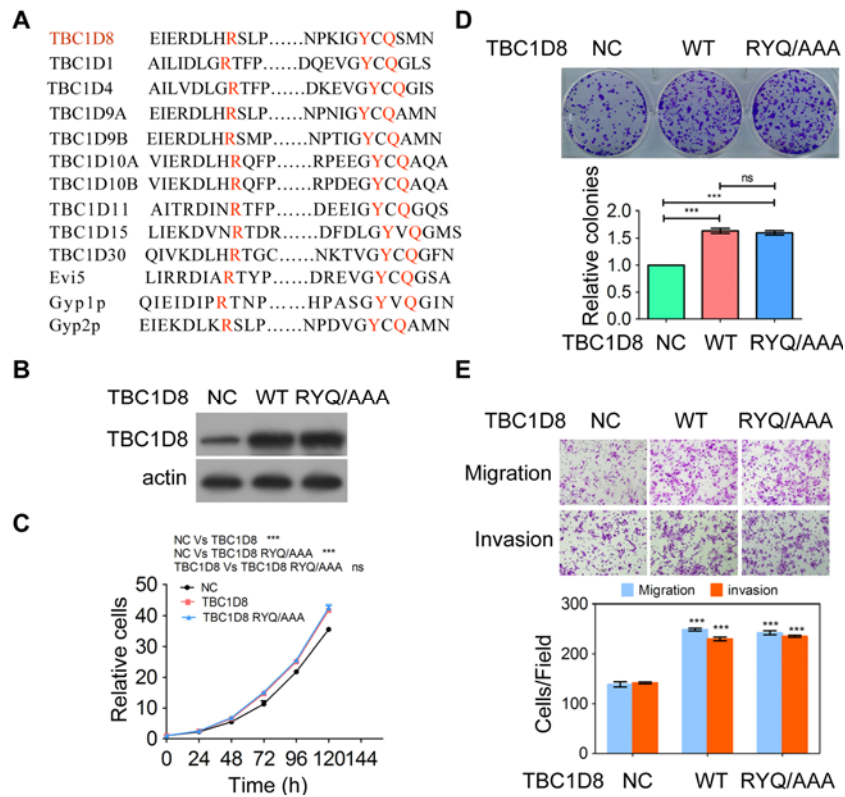

**Figure S5**

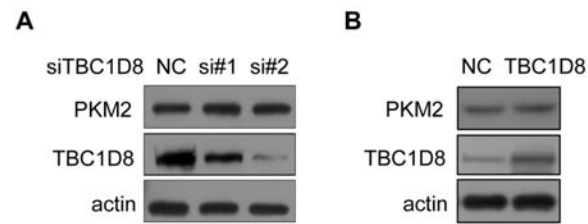

**Figure S5.** *TBC1D8* does not change the PKM2 protein level. OV-3<sup>high</sup> and OV-3 cells were transfected with two anti-*TBC1D8* siRNAs (A) and *TBC1D8* plasmids (B) for 48 h, respectively, and the levels of the indicated proteins were determined by Western blotting.

**Figure S6**

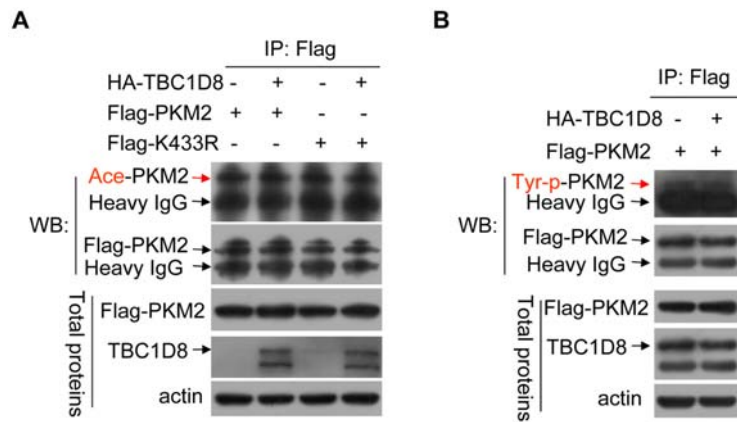

**Figure S6.** *TBC1D8* does not change the acetylation and phosphorylation levels of PKM2. (A) HEK293T cells were co-transfected with *TBC1D8* vectors together with wild-type or K433R mutant *Flag-PKM2* plasmids; Flag-PKM2 was IPed by anti-Flag antibody; and the PKM2 acetylation level was determined by Western blotting using an anti-acetylated lysine antibody. (B) HEK293T cells were co-transfected with *TBC1D8* vectors together with *Flag-PKM2* plasmids; Flag-PKM2 was IPed by an anti-Flag antibody; and the tyrosine-phosphorylation level of PKM2 was determined by Western blotting using an anti-phosphotyrosine antibody.

**Figure S7**

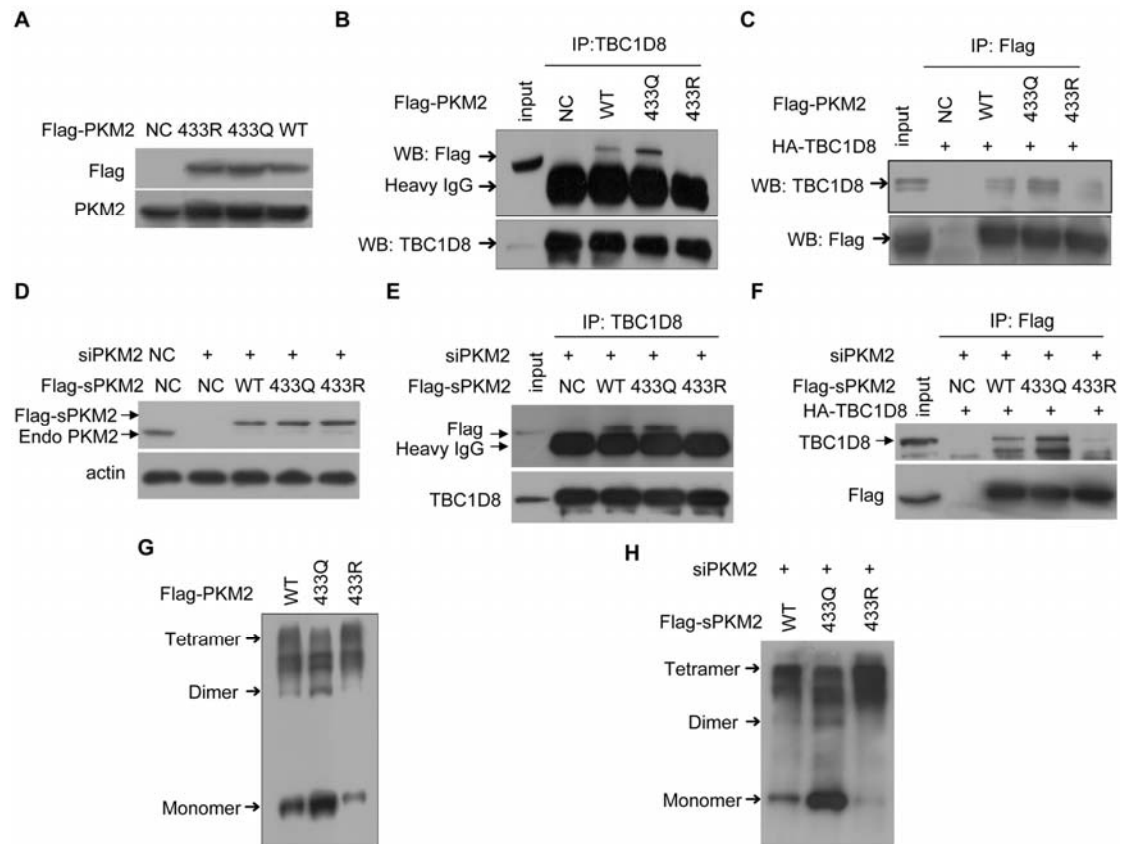

**Figure S7.** TBC1D8 interacts with dimeric PKM2, not tetrameric PKM2. (A) The indicated *Flag-PKM2* mutants were transfected into HEK293T cells, and the *Flag-PKM2* protein level was detected. (B) The TBC1D8 complexes in OVCAR-3 cells, which were transfected with the indicated *Flag-PKM2* vectors, were co-IPed using an anti-TBC1D8 antibody, and *Flag-PKM2* expression in the complexes was detected using an anti-Flag antibody. (C) HEK293T cells were co-transfected with the indicated *Flag-PKM2* mutants together with *HA-TBC1D8* vectors; the *Flag-PKM2* complexes were co-IPed using an anti-Flag antibody; and *HA-TBC1D8* expression in the complexes was detected using anti-HA antibody. (D) HEK293T cells were co-transfected with anti-PKM2 siRNAs together with the indicated synonymous mutant *Flag-sPKM2* plasmids, the PKM2 levels were determined. (E) OVCAR-3 cells were co-transfected with anti-PKM2 siRNAs together with the indicated synonymous

mutant Flag-sPKM2 plasmids, the TBC1D8 complexes were co-IPed using an anti-TBC1D8 antibody, and Flag-PKM2 expression in the complexes was detected using an anti-Flag antibody. (F) HEK293T cells were co-transfected with anti-PKM2 siRNAs together with the indicated synonymous mutant Flag-sPKM2 plasmids and HA-TBC1D8 vector, the Flag-PKM2 complexes were co-IPed using an anti-Flag antibody; and HA-TBC1D8 expression in the complexes was detected using anti-HA antibody. (G) Cell lysates were prepared from HEK293T cells transfected with the indicated *Flag-PKM2* mutants, followed by cross-linking treatment. Flag-PKM2 was detected by Western blotting using an anti-Flag antibody. (H) Cell lysates were prepared from HEK293T cells transfected with anti-PKM2 siRNAs together with the indicated synonymous mutant Flag-sPKM2 plasmids, followed by cross-linking treatment. Flag-PKM2 was detected by Western blotting using an anti-Flag antibody.



**Figure S8**

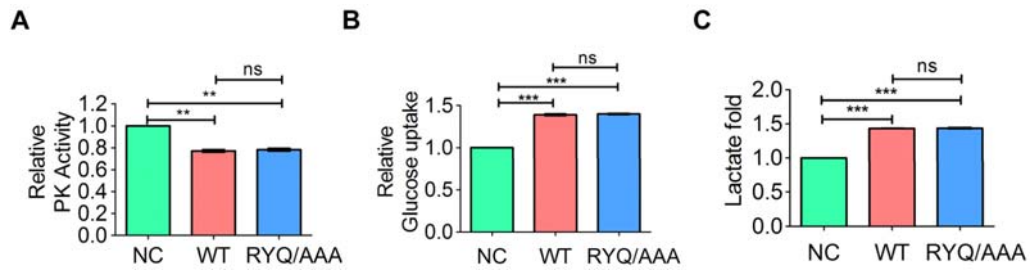

**Figure S8.** TBC1D8 inhibits PK activity and promotes aerobic glycolysis in a GAP activity-independent manner. The WT TBC1D8 or its RYQ/AAA mutant was transfected into OVCAR-3 cells, PK activity (A), glucose uptake (B), and lactate production (C) were determined (n=3).

## Supplementary Tables

**Supplementary Table S2.** Correlations between TBC1D8 level and clinico-pathological features in 141 OVCA cases.

| clinical characters | All cases | TBC1D8 |      | <i>p</i> value* |
|---------------------|-----------|--------|------|-----------------|
|                     |           | Low    | High |                 |
| Age(Years)          |           |        |      | 0.078           |
| <50                 | 65        | 14     | 51   |                 |
| ≥50                 | 75        | 8      | 67   |                 |
| Histological Grade  |           |        |      | 0.131           |
| G1-G2               | 23        | 5      | 18   |                 |
| G3                  | 93        | 8      | 85   |                 |
| Recurrence          |           |        |      | 0.003           |
| Yes                 | 111       | 12     | 99   |                 |
| No                  | 30        | 10     | 20   |                 |
| pT status           |           |        |      | 0.048           |
| 1                   | 45        | 11     | 34   |                 |
| 2-3                 | 96        | 11     | 85   |                 |
| pN status           |           |        |      | 0.045           |
| 0                   | 111       | 21     | 90   |                 |
| 1                   | 30        | 1      | 29   |                 |
| pM status           |           |        |      | 0.197           |
| 0                   | 120       | 21     | 99   |                 |
| 1                   | 21        | 1      | 20   |                 |
| Clinical Stage      |           |        |      | 0.048           |
| I - II              | 45        | 11     | 34   |                 |
| III-IV              | 96        | 11     | 85   |                 |

\*Pearson Chi-square test.

**Supplementary Table S3.** Univariate and multivariate analysis of different prognostic parameters in 141 patients with OVCA.

| Clinical character                   | OS(months)          |          |                            |          |
|--------------------------------------|---------------------|----------|----------------------------|----------|
|                                      | Univariate analysis |          | Multivariate analysis      |          |
|                                      | HR(95% CI)          | p value* | HR(95% CI)                 | p value* |
| Age( $\geq$ 50y vs. <50y)            | 1.47(0.90-2.39)     | 0.119    | 1.17(0.70-1.95)            | 0.549    |
| Histological Grade<br>(G3 vs. G1-G2) | 1.71(0.85-3.47)     | 0.134    | 0.88(0.41-1.91)            | 0.754    |
| Recurrence of<br>cancer(yes vs. no)  | 35.00(3.82-321.01)  | 0.002    | 282388.73<br>(0-3.74E+200) | 0.956    |
| pN status(1 vs. 0)                   | 5.57(3.40-9.12)     | 0.000    | 1.24(1.01-4.20)            | 0.524    |
| pM status(1 vs. 0)                   | 6.29(3.65-10.84)    | 0.000    | 2.06(1.01-4.20)            | 0.046    |
| pT status(2-3 vs. 1)                 | 11.24(4.09-30.91)   | 0.000    | 3.57(1.01-12.59)           | 0.047    |
| TBC1D8                               | 2.79(2.17-3.58)     | 0.000    | 2.11(1.61-2.78)            | 0.000    |

\*Cox proportional hazard model.

**Supplementary Table S5.** Quantitative real-time PCR primers and the siRNA sequences used in this study.

| <b>Primers name</b> |            | <b>Sequence (5'-3')</b>   |
|---------------------|------------|---------------------------|
| MYC                 | Forward    | GGAGGCTATTCTGCCCATTTG     |
|                     | Reverse    | CGAGGTCATAGTTCCTGTTGGTG   |
| LDH                 | Forward    | CATGGCCTGTGCCATCAGTATC    |
|                     | Reverse    | TGCCAGAGACAATCTTTGGTGTTC  |
| GLUT1               | Forward    | TGTGGGCATGTGCTTCCAGTA     |
|                     | Reverse    | CGGCCTTTAGTCTCAGGAACTTTG  |
| cyclinD1            | Forward    | GTGCATCTACACCGACAACCTCC   |
|                     | Reverse    | GTTCCACTTGAGCTTGTTCACC    |
| PDK1                | Forward    | GCTGTATGGCCTGCAAGATGA     |
|                     | Reverse    | AACATTCTGGCTGGTGACAGGA    |
| GAPDH               | Forward    | GAAGGTGAAGGTCGGAGTC       |
|                     | Reverse    | AAGATGGTGATGGGATTTC       |
| MEK5                | Forward    | ACAGCAGCCCAGCAGTCTCA      |
|                     | Reverse    | GTCCCGATATCGTATGTCTTGTTC  |
| <b>siRNAs</b>       |            | <b>Sequence (5'-3')</b>   |
| siTBC1D8#1          | Sense      | CCGAAUCACCACGCAGAAUTT     |
|                     | Anti-sense | AUUCUGCGUGGUGAUUCGGTT     |
| siTBC1D8#1          | Sense      | GCUUCACUCGUGUUUCAUUTT     |
|                     | Anti-sense | AAUGAAACACGAGUGAAGCTT     |
| NC siRNAs           | Sense      | GCACAAGCUGGAGUACAACUACATT |
|                     | Anti-sense | UGUAGUUGUACUCCAGCUUGUGCTT |
| siPKM2              | Sense      | GCCAUCUACCACUUGCAAUTT     |
|                     | Anti-sense | AUUGCAAGUGGUAGAUGGCTT     |
